# Supplementary material for: Multi-Platform Omics Analysis for Identification of Molecular Characteristics and Therapeutic Targets of Uveal Melanoma
Source: PubMed Central journal article supplement (PMC6917695; doi:10.1038/s41598-019-55513-z), 2019-12-17
Supplement: 41598_2019_55513_MOESM1_ESM.pdf [file 41598_2019_55513_MOESM1_ESM.pdf]

## **Supplementary Materials for:**

### **Multi-Platform Omics Analysis for Identification of Molecular Characteristics and Therapeutic Targets of Uveal Melanoma**

Yong Joon Kim<sup>1</sup> Seo Jin Park<sup>1</sup>, Kyung Joo Maeng<sup>1</sup>, Sung Chul Lee<sup>1</sup>, Christopher Seungkyu Lee<sup>1,2</sup>

<sup>1</sup>Department of Ophthalmology, Institute of Vision Research, Severance Hospital, Yonsei University College of Medicine, Seoul, Republic of Korea.

<sup>2</sup>Department of Ophthalmology, Institute of Vision Research, Gangnam Severance Hospital, Yonsei University College of Medicine, Seoul, Republic of Korea.

#### **Supplementary Materials**

**Supplementary Figure 1.** Detailed results of the mutational signature decomposition of uveal melanoma samples.

**Supplementary Figure 2.** Detailed results of the mutational signature decomposition of skin cutaneous melanoma samples.

**Supplementary Table 1.** The number of mutations identified by whole exome sequencing in uveal melanomas and skin cutaneous melanomas

**Supplementary Table 2.** The results of Gene Set Enrichment Analysis using transcriptomes of primary uveal melanomas and skin cutaneous melanomas.

**Supplementary Table 3.** The results of kinome-wide siRNA screen (two biological replicates).

Supplementary Figure 1. Detailed results of the mutational signature decomposition of uveal melanoma samples.

Total mutations: 1908

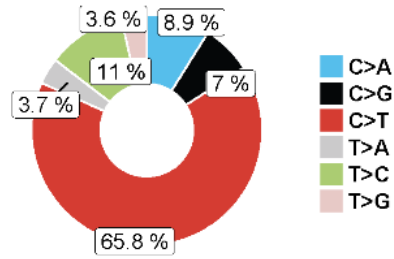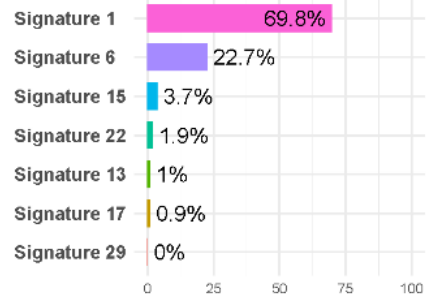

Cosine Similarity: 0.97

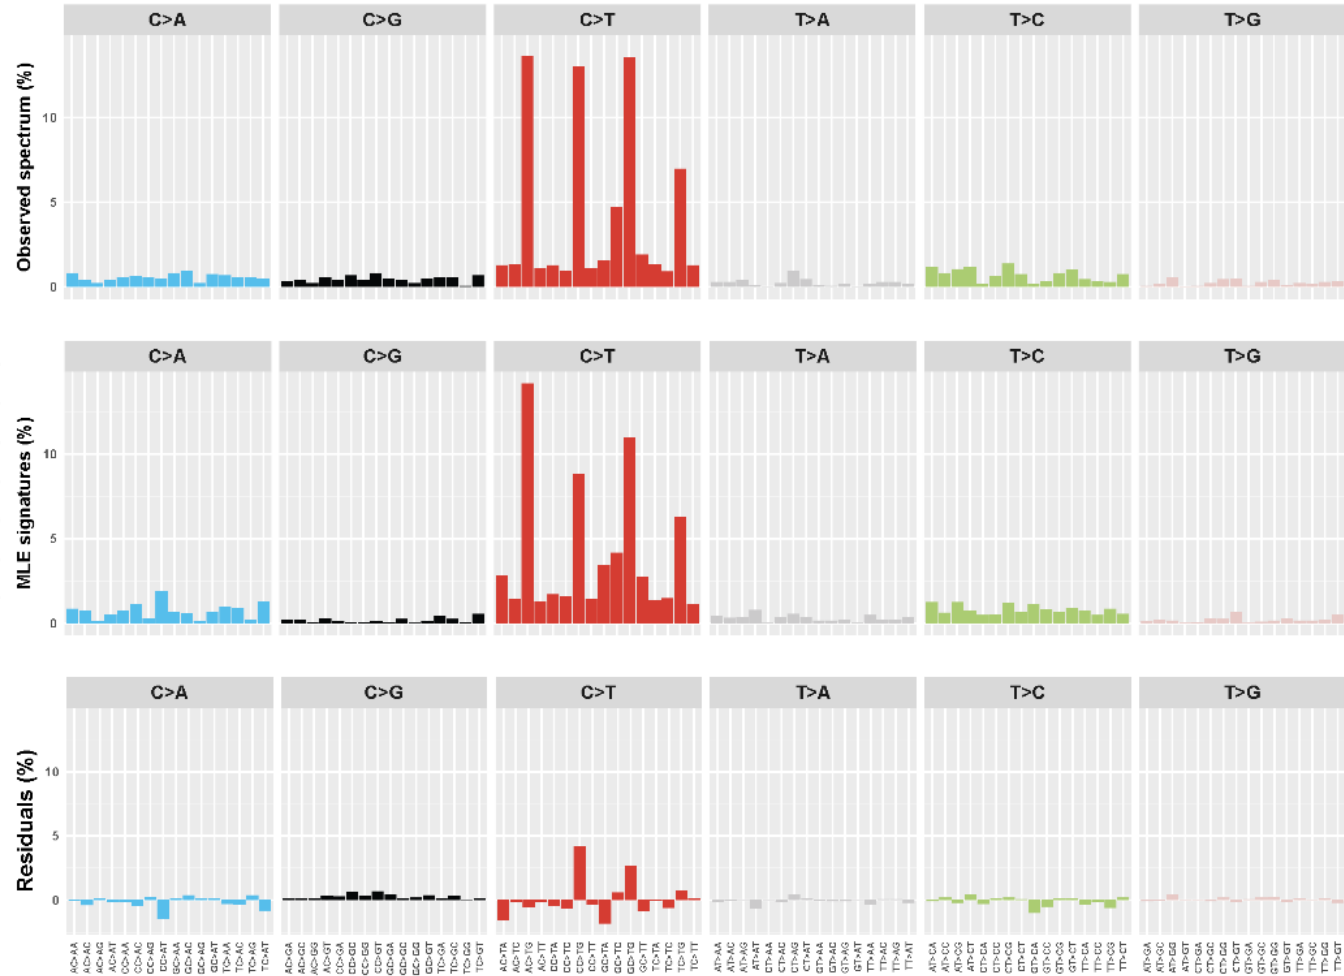

Supplementary Figure 2. Detailed results of the mutational signature decomposition of skin cutaneous melanoma samples.

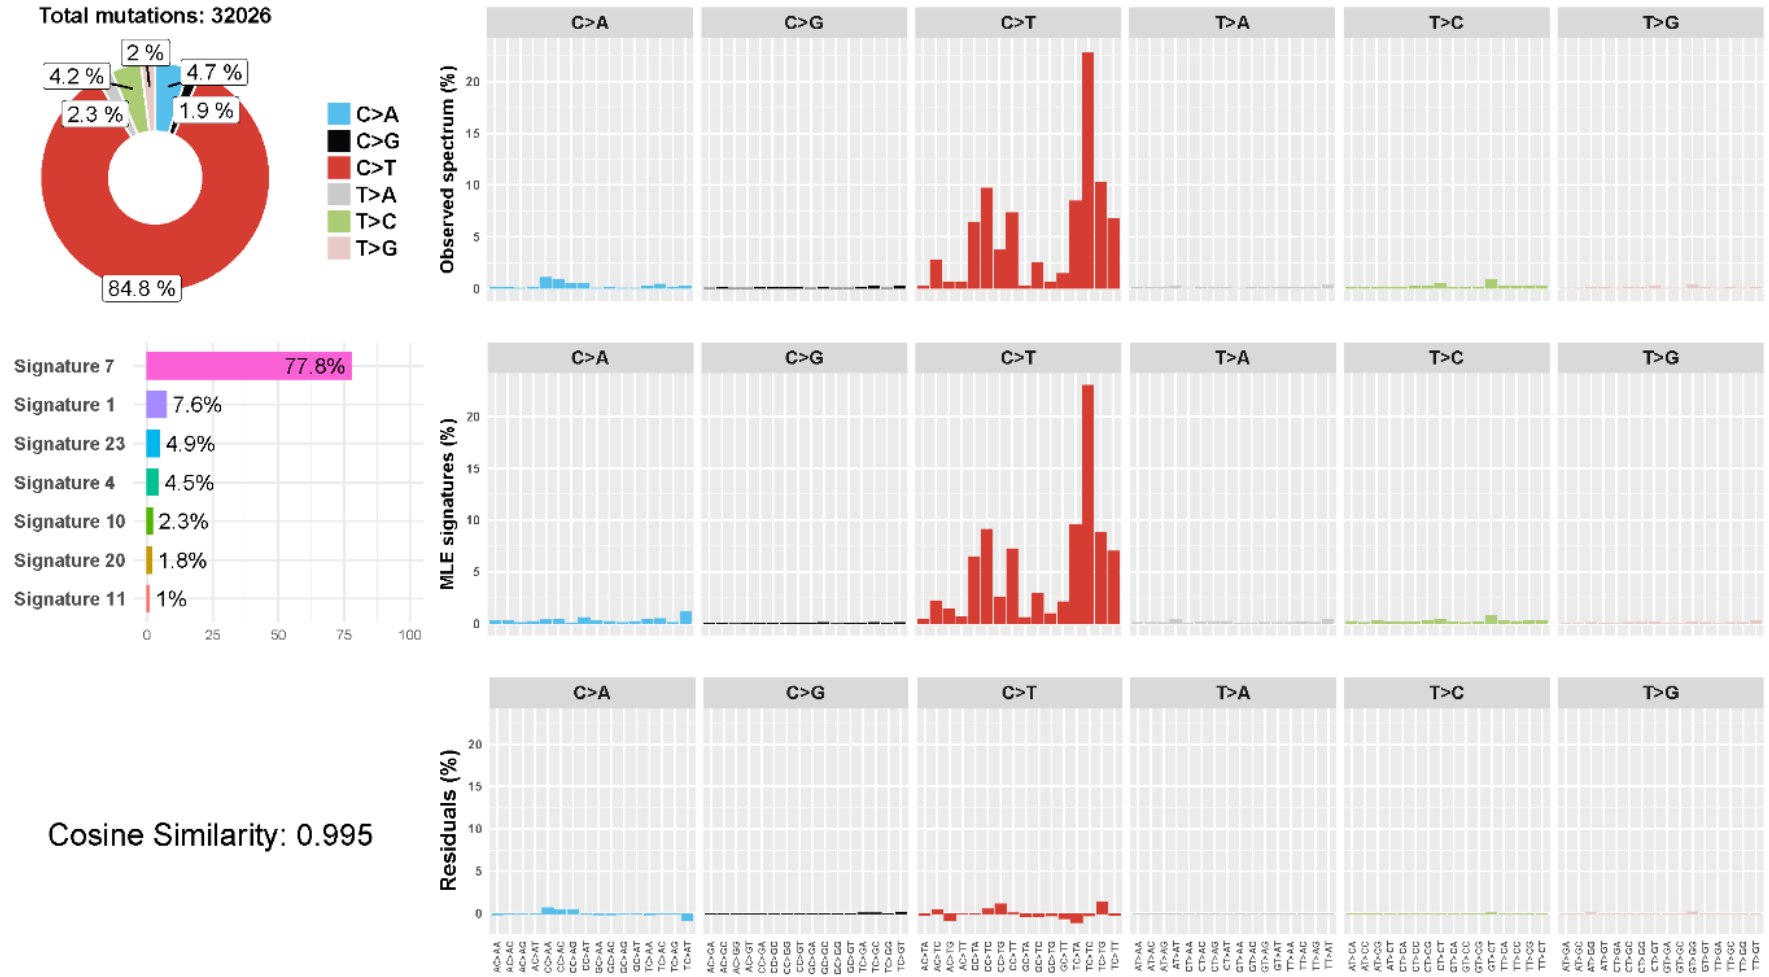

**Supplementary Table 1. The number of mutations identified by whole exome sequencing in uveal melanomas and skin cutaneous melanomas**

|                    | UVM              | SKCM               | P-value |
|--------------------|------------------|--------------------|---------|
| Number of patients | 80               | 67                 | -       |
| Total mutations    | 19.0 (16.0–25.0) | 321.0 (91.0–620.0) | < 0.001 |
| SNV                | 17.0 (14.0–22.8) | 285.0 (84.0–588.0) | < 0.001 |
| DNV                | 0.0 (0.0–0.0)    | 11.0 (2.0–20.0)    | < 0.001 |
| INS                | 0.0 (0.0–1.0)    | 1.0 (0.0–2.0)      | < 0.001 |
| DEL                | 2.0 (1.0–3.0)    | 4.0 (2.0–6.0)      | < 0.001 |

UVM = uveal melanoma, SKCM = Skin cutaneous melanoma, SNV = Single nucleotide variants, DNV = double nucleotide variants, INS = insertion, DEL = deletion  
 Data are presented in median (interquartile range)

**Supplementary Table 2. The results of Gene Set Enrichment Analysis using transcriptomes of primary uveal melanomas and skin cutaneous melanomas.**

| NAME                                          | NES    | NOM p-value | FDR q-value | RANK at MAX |
|-----------------------------------------------|--------|-------------|-------------|-------------|
| Gene Sets Enriched in Uveal melanoma          |        |             |             |             |
| VEGF_A_UP.V1_UP                               | 1.471  | <0.001      | 0.155       | 3096        |
| MYC_UP.V1_UP                                  | 1.464  | <0.001      | 0.084       | 4237        |
| SIRNA	EIF4GI_UP                               | 1.393  | 0.027       | 0.114       | 2237        |
| RAPA_EARLY_UP.V1_DN                           | 1.373  | <0.001      | 0.106       | 2613        |
| MTOR_UP.V1_DN                                 | 1.336  | 0.011       | 0.121       | 2036        |
| Gene Sets Enriched in Skin Cutaneous Melanoma |        |             |             |             |
| VEGF_A_UP.V1_DN                               | -2.480 | <0.001      | <0.001      | 3905        |
| SIRNA	EIF4GI_DN                               | -2.384 | <0.001      | <0.001      | 4390        |
| RB_P107_DN.V1_UP                              | -2.383 | <0.001      | <0.001      | 2875        |
| CSR_LATE_UP.V1_UP                             | -2.352 | <0.001      | <0.001      | 3073        |
| CORDENONSI_YAP_CONSERVED_SIGNATURE            | -2.198 | <0.001      | <0.001      | 4529        |
| EGFR_UP.V1_UP                                 | -2.166 | <0.001      | <0.001      | 5430        |
| ERB2_UP.V1_DN                                 | -2.129 | <0.001      | <0.001      | 6070        |
| RPS14_DN.V1_DN                                | -2.106 | <0.001      | <0.001      | 3041        |
| TBK1.DF_DN                                    | -2.096 | <0.001      | <0.001      | 4746        |
| GCNP_SHH_UP_LATE.V1_UP                        | -2.074 | <0.001      | <0.001      | 4681        |
| RAF_UP.V1_UP                                  | -2.072 | <0.001      | <0.001      | 4926        |
| CSR_EARLY_UP.V1_UP                            | -2.032 | <0.001      | <0.001      | 4661        |
| TBK1.DF_UP                                    | -1.992 | <0.001      | <0.001      | 4459        |

|                                  |        |        |        |      |
|----------------------------------|--------|--------|--------|------|
| MEL18_DN.V1_UP                   | -1.978 | <0.001 | <0.001 | 7362 |
| BMI1_DN_MEL18_DN.V1_UP           | -1.953 | <0.001 | <0.001 | 7414 |
| GCNP_SHH_UP_EARLY.V1_UP          | -1.952 | <0.001 | <0.001 | 3173 |
| SINGH_KRAS_DEPENDENCY_SIGNATURE_ | -1.951 | <0.001 | <0.001 | 5842 |
| HOXA9_DN.V1_DN                   | -1.946 | <0.001 | <0.001 | 3349 |
| RPS14_DN.V1_UP                   | -1.914 | <0.001 | <0.001 | 6499 |
| PRC2_EZH2_UP.V1_DN               | -1.912 | <0.001 | <0.001 | 3987 |
| STK33_SKM_UP                     | -1.901 | <0.001 | <0.001 | 5485 |
| PRC2_EZH2_UP.V1_UP               | -1.884 | <0.001 | <0.001 | 4765 |
| KRAS.DF.V1_UP                    | -1.872 | <0.001 | <0.001 | 4710 |
| RB_P130_DN.V1_DN                 | -1.861 | <0.001 | <0.001 | 6289 |
| IL15_UP.V1_UP                    | -1.860 | <0.001 | <0.001 | 5533 |
| E2F3_UP.V1_UP                    | -1.848 | <0.001 | <0.001 | 3316 |
| MYC_UP.V1_DN                     | -1.836 | <0.001 | <0.001 | 5301 |
| TGFB_UP.V1_UP                    | -1.825 | <0.001 | <0.001 | 5509 |
| IL2_UP.V1_UP                     | -1.822 | <0.001 | <0.001 | 5440 |
| PIGF_UP.V1_UP                    | -1.822 | <0.001 | <0.001 | 6998 |
| BMI1_DN.V1_UP                    | -1.822 | <0.001 | <0.001 | 7236 |
| SRC_UP.V1_DN                     | -1.820 | <0.001 | <0.001 | 5066 |
| STK33_UP                         | -1.793 | <0.001 | 0.001  | 5410 |
| HINATA_NFKB_IMMU_INF             | -1.786 | 0.003  | 0.001  | 3699 |
| HOXA9_DN.V1_UP                   | -1.783 | <0.001 | 0.001  | 6220 |
| STK33_NOMO_UP                    | -1.782 | <0.001 | 0.001  | 4879 |
| LTE2_UP.V1_DN                    | -1.778 | <0.001 | 0.001  | 6941 |
| E2F1_UP.V1_UP                    | -1.766 | <0.001 | 0.001  | 3670 |
| SNF5_DN.V1_UP                    | -1.758 | <0.001 | 0.001  | 4747 |

|                               |        |        |       |      |
|-------------------------------|--------|--------|-------|------|
| BCAT_GDS748_UP                | -1.729 | 0.003  | 0.001 | 4656 |
| CAHOY_OLIGODENDROCUTIC        | -1.717 | <0.001 | 0.001 | 5389 |
| MTOR_UP.V1_UP                 | -1.708 | 0.001  | 0.001 | 3865 |
| TBK1.DN.48HRS_DN              | -1.702 | 0.003  | 0.001 | 4900 |
| KRAS.LUNG.BREAST_UP.V1_UP     | -1.701 | <0.001 | 0.001 | 6364 |
| ESC_V6.5_UP_EARLY.V1_DN       | -1.651 | <0.001 | 0.003 | 6784 |
| MEK_UP.V1_DN                  | -1.640 | 0.000  | 0.003 | 6941 |
| AKT_UP.V1_UP                  | -1.637 | <0.001 | 0.003 | 5284 |
| P53_DN.V1_UP                  | -1.632 | 0.000  | 0.003 | 6669 |
| MTOR_UP.N4.V1_UP              | -1.632 | <0.001 | 0.003 | 4775 |
| TBK1.DN.48HRS_UP              | -1.627 | 0.007  | 0.003 | 1845 |
| EGFR_UP.V1_DN                 | -1.625 | 0.001  | 0.003 | 4844 |
| RELA_DN.V1_DN                 | -1.619 | <0.001 | 0.003 | 6932 |
| AKT_UP_MTOR_DN.V1_UP          | -1.594 | <0.001 | 0.005 | 5284 |
| MEK_UP.V1_UP                  | -1.570 | <0.001 | 0.006 | 4229 |
| E2F1_UP.V1_DN                 | -1.560 | <0.001 | 0.007 | 4705 |
| CTIP_DN.V1_DN                 | -1.553 | 0.001  | 0.008 | 6971 |
| KRAS.BREAST_UP.V1_UP          | -1.545 | 0.004  | 0.009 | 6596 |
| ATF2_S_UP.V1_UP               | -1.541 | <0.001 | 0.009 | 3588 |
| PRC2_EED_UP.V1_DN             | -1.483 | 0.011  | 0.019 | 2997 |
| KRAS.600.LUNG.BREAST_UP.V1_UP | -1.482 | 0.000  | 0.019 | 6377 |
| BCAT_BILD_ET_AL_DN            | -1.481 | 0.042  | 0.019 | 4681 |
| ESC_V6.5_UP_LATE.V1_DN        | -1.472 | 0.002  | 0.021 | 3259 |
| RB_P107_DN.V1_DN              | -1.466 | 0.015  | 0.022 | 4619 |
| SNF5_DN.V1_DN                 | -1.459 | 0.005  | 0.023 | 4656 |
| CRX_DN.V1_DN                  | -1.452 | 0.017  | 0.025 | 4272 |

|                       |        |       |       |      |
|-----------------------|--------|-------|-------|------|
| RAF_UP.V1_DN          | -1.447 | 0.011 | 0.026 | 4614 |
| PDGF_UP.V1_UP         | -1.426 | 0.011 | 0.033 | 3096 |
| KRAS.LUNG_UP.V1_UP    | -1.423 | 0.015 | 0.034 | 6104 |
| ESC_J1_UP_LATE.V1_UP  | -1.414 | 0.008 | 0.037 | 4881 |
| NRL_DN.V1_DN          | -1.414 | 0.014 | 0.036 | 5749 |
| CAHOY_ASTROGLIAL      | -1.410 | 0.024 | 0.037 | 4890 |
| LEF1_UP.V1_UP         | -1.401 | 0.012 | 0.040 | 6684 |
| KRAS.300_UP.V1_UP     | -1.392 | 0.021 | 0.044 | 5148 |
| LTE2_UP.V1_UP         | -1.390 | 0.016 | 0.045 | 3863 |
| ATF2_UP.V1_UP         | -1.382 | 0.020 | 0.048 | 3026 |
| RB_DN.V1_UP           | -1.379 | 0.025 | 0.049 | 3541 |
| CRX_NRL_DN.V1_DN      | -1.343 | 0.044 | 0.071 | 5087 |
| JNK_DN.V1_UP          | -1.329 | 0.028 | 0.082 | 7498 |
| CAMP_UP.V1_DN         | -1.328 | 0.036 | 0.081 | 4478 |
| JNK_DN.V1_DN          | -1.326 | 0.027 | 0.082 | 5067 |
| RB_DN.V1_DN           | -1.322 | 0.037 | 0.084 | 3206 |
| ATM_DN.V1_DN          | -1.321 | 0.035 | 0.084 | 6199 |
| ESC_J1_UP_EARLY.V1_DN | -1.318 | 0.039 | 0.085 | 3541 |
| PRC1_BMI_UP.V1_UP     | -1.310 | 0.027 | 0.092 | 7577 |
| KRAS.LUNG_UP.V1_DN    | -1.309 | 0.043 | 0.092 | 8033 |
| ATF2_UP.V1_DN         | -1.297 | 0.046 | 0.100 | 7677 |
| PRC2_SUZ12_UP.V1_DN   | -1.297 | 0.048 | 0.099 | 7052 |
| KRAS.600_UP.V1_UP     | -1.283 | 0.035 | 0.112 | 5301 |
| NFE2L2.V2             | -1.260 | 0.020 | 0.131 | 6409 |



**Supplementary Table 3. The results of kinome-wide siRNA screen (two biological replicates).**

| Number | Rank | Gene ID | Gene Symbol | Relative cell viability (Z-score) |             |         |
|--------|------|---------|-------------|-----------------------------------|-------------|---------|
|        |      |         |             | Replicate 1                       | Replicate 2 | Average |
| 461    | 1    | 7465    | WEE1        | -3.120                            | -5.477      | -4.299  |
| 25     | 2    | 5347    | PLK1        | -3.216                            | -4.660      | -3.938  |
| 264    | 3    | 1111    | CHEK1       | -3.261                            | -4.589      | -3.925  |
| 698    | 4    | 5170    | PDPK1       | -2.955                            | -4.371      | -3.663  |
| 266    | 5    | 728642  | CDC2L2      | -3.172                            | -4.064      | -3.618  |
| 256    | 6    | 5296    | PIK3R2      | -2.366                            | -3.102      | -2.734  |
| 322    | 7    | 9212    | AURKB       | -2.232                            | -3.138      | -2.685  |
| 608    | 8    | 27010   | TPK1        | -1.958                            | -2.576      | -2.267  |
| 374    | 9    | 51755   | CRK7        | -2.069                            | -2.372      | -2.220  |
| 566    | 10   | 200576  | PIP5K3      | -1.015                            | -3.319      | -2.167  |
| 278    | 11   | 6790    | AURKA       | -2.112                            | -2.085      | -2.099  |
| 707    | 12   | 2932    | GSK3B       | -1.689                            | -2.472      | -2.080  |
| 563    | 13   | 5207    | PFKFB1      | -1.671                            | -2.339      | -2.005  |
| 515    | 14   | 81788   | SNARK       | -2.164                            | -1.744      | -1.954  |
| 269    | 15   | 984     | CDC2L1      | -1.851                            | -1.987      | -1.919  |
| 406    | 16   | 701     | BUB1B       | -1.558                            | -2.279      | -1.919  |
| 454    | 17   | 23476   | BRD4        | -2.094                            | -1.731      | -1.912  |
| 286    | 18   | 5590    | PRKCZ       | -2.101                            | -1.683      | -1.892  |
| 353    | 19   | 6731    | SRP72       | -1.653                            | -2.029      | -1.841  |
| 513    | 20   | 6872    | TAF1        | -2.219                            | -1.420      | -1.819  |
| 400    | 21   | 65220   | FLJ13052    | -1.844                            | -1.781      | -1.813  |
| 275    | 22   | 4593    | MUSK        | -1.674                            | -1.770      | -1.722  |
| 324    | 23   | 2868    | GRK4        | -1.512                            | -1.856      | -1.684  |
| 265    | 24   | 8631    | SCAP1       | -1.699                            | -1.632      | -1.666  |
| 564    | 25   | 3645    | INSRR       | -1.081                            | -2.112      | -1.597  |
| 404    | 26   | 5600    | MAPK11      | -1.456                            | -1.707      | -1.581  |
| 354    | 27   | 9162    | DGKI        | -1.578                            | -1.582      | -1.580  |
| 246    | 28   | 2045    | EPHA7       | -1.583                            | -1.564      | -1.573  |
| 434    | 29   | 55359   | STYK1       | -1.522                            | -1.534      | -1.528  |
| 648    | 30   | 29959   | NRBP        | -1.277                            | -1.777      | -1.527  |
| 600    | 31   | 11344   | PTK9L       | -0.434                            | -2.548      | -1.491  |
| 447    | 32   | 156     | ADRBK1      | -1.428                            | -1.552      | -1.490  |
| 283    | 33   | 8503    | PIK3R3      | -1.708                            | -1.221      | -1.464  |
| 285    | 34   | 65267   | PRKWNK3     | -1.596                            | -1.323      | -1.460  |

|     |    |        |          |        |        |        |
|-----|----|--------|----------|--------|--------|--------|
| 565 | 35 | 1740   | DLG2     | -0.577 | -2.324 | -1.451 |
| 482 | 36 | 29922  | NME7     | -1.207 | -1.636 | -1.421 |
| 616 | 37 | 9475   | ROCK2    | -1.520 | -1.287 | -1.403 |
| 253 | 38 | 3932   | LCK      | -1.460 | -1.343 | -1.402 |
| 481 | 39 | 26750  | RPS6KC1  | -0.610 | -2.151 | -1.381 |
| 243 | 40 | 51701  | NLK      | -1.499 | -1.233 | -1.366 |
| 445 | 41 | 5597   | MAPK6    | -1.433 | -1.284 | -1.358 |
| 610 | 42 | 415116 | PIM3     | -1.089 | -1.582 | -1.335 |
| 46  | 43 | 8844   | KSR      | -1.340 | -1.326 | -1.333 |
| 487 | 44 | 4752   | NEK3     | -1.181 | -1.481 | -1.331 |
| 644 | 45 | 23049  | SMG1     | -1.070 | -1.560 | -1.315 |
| 126 | 46 | 4882   | NPR2     | -1.576 | -1.048 | -1.312 |
| 508 | 47 | 5589   | PRKCSH   | -0.846 | -1.777 | -1.311 |
| 308 | 48 | 23636  | NUP62    | -1.086 | -1.522 | -1.304 |
| 364 | 49 | 5631   | PRPS1    | -1.640 | -0.968 | -1.304 |
| 485 | 50 | 2263   | FGFR2    | -1.185 | -1.420 | -1.302 |
| 433 | 51 | 2081   | ERN1     | -1.360 | -1.212 | -1.286 |
| 323 | 52 | 3985   | LIMK2    | -1.249 | -1.305 | -1.277 |
| 624 | 53 | 3643   | INSR     | -1.159 | -1.355 | -1.257 |
| 483 | 54 | 4294   | MAP3K10  | -1.137 | -1.377 | -1.257 |
| 244 | 55 | 5209   | PFKFB3   | -1.235 | -1.269 | -1.252 |
| 567 | 56 | 657    | BMPR1A   | -0.492 | -2.011 | -1.252 |
| 372 | 57 | 2268   | FGR      | -1.215 | -1.266 | -1.240 |
| 329 | 58 | 4598   | MVK      | -1.256 | -1.224 | -1.240 |
| 592 | 59 | 57144  | PAK7     | -1.111 | -1.355 | -1.233 |
| 488 | 60 | 10087  | COL4A3BP | -0.607 | -1.845 | -1.226 |
| 367 | 61 | 7297   | TYK2     | -1.372 | -1.039 | -1.206 |
| 606 | 62 | 5166   | PDK4     | -1.836 | -0.569 | -1.203 |
| 689 | 63 | 673    | BRAF     | -1.501 | -0.897 | -1.199 |
| 279 | 64 | 10298  | PAK4     | -1.249 | -1.144 | -1.196 |
| 426 | 65 | 5127   | PCTK1    | -1.358 | -1.027 | -1.193 |
| 443 | 66 | 2580   | GAK      | -1.335 | -1.048 | -1.192 |
| 355 | 67 | 1445   | CSK      | -0.974 | -1.367 | -1.171 |
| 493 | 68 | 1946   | EFNA5    | -0.916 | -1.420 | -1.168 |
| 344 | 69 | 197258 | FUK      | -1.247 | -1.084 | -1.165 |
| 365 | 70 | 1453   | CSNK1D   | -1.721 | -0.604 | -1.163 |
| 327 | 71 | 10020  | GNE      | -0.840 | -1.466 | -1.153 |
| 298 | 72 | 1606   | DGKA     | -1.279 | -0.950 | -1.114 |
| 277 | 73 | 79012  | MGC8407  | -1.095 | -1.132 | -1.113 |
| 664 | 74 | 8899   | PRPF4B   | -1.347 | -0.869 | -1.108 |

|     |     |        |               |        |        |        |
|-----|-----|--------|---------------|--------|--------|--------|
| 427 | 75  | 4216   | MAP3K4        | -1.038 | -1.174 | -1.106 |
| 436 | 76  | 8395   | PIP5K1B       | -1.111 | -1.090 | -1.100 |
| 486 | 77  | 2065   | ERBB3         | -0.179 | -2.011 | -1.095 |
| 437 | 78  | 1716   | DGUOK         | -1.254 | -0.935 | -1.094 |
| 306 | 79  | 283455 | KSR2          | -1.142 | -1.019 | -1.080 |
| 84  | 80  | 3654   | IRAK1         | -0.652 | -1.495 | -1.074 |
| 366 | 81  | 8444   | DYRK3         | -1.499 | -0.646 | -1.072 |
| 122 | 82  | 2475   | FRAP1         | -0.484 | -1.659 | -1.072 |
| 435 | 83  | 9891   | ARK5          | -1.113 | -1.022 | -1.067 |
| 267 | 84  | 6788   | STK3          | -1.038 | -1.084 | -1.061 |
| 501 | 85  | 4915   | NTRK2         | -0.846 | -1.265 | -1.055 |
| 363 | 86  | 28996  | HIPK2         | -1.449 | -0.655 | -1.052 |
| 208 | 87  | 1436   | CSF1R         | -0.593 | -1.498 | -1.046 |
| 195 | 88  | 2064   | ERBB2         | -0.513 | -1.573 | -1.043 |
| 276 | 89  | 9706   | ULK2          | -1.111 | -0.968 | -1.039 |
| 87  | 90  | 4217   | MAP3K5        | -0.992 | -1.084 | -1.038 |
| 405 | 91  | 5232   | PGK2          | -0.970 | -1.102 | -1.036 |
| 4   | 92  | 1760   | DMPK          | -1.156 | -0.908 | -1.032 |
| 561 | 93  | 5583   | PRKCH         | 0.156  | -2.191 | -1.018 |
| 196 | 94  | 5571   | PRKAG1        | -0.559 | -1.475 | -1.017 |
| 287 | 95  | 3702   | ITK           | -1.247 | -0.768 | -1.007 |
| 361 | 96  | 57761  | TRIB3         | -0.872 | -1.141 | -1.006 |
| 10  | 97  | 816    | CAMK2B        | -0.647 | -1.364 | -1.006 |
| 247 | 98  | 140901 | STK35         | -1.140 | -0.846 | -0.993 |
| 705 | 99  | 4638   | MYLK          | -0.209 | -1.762 | -0.986 |
| 425 | 100 | 388228 | SBK1          | -1.254 | -0.703 | -0.978 |
| 294 | 101 | 157285 | DKFZP761P0423 | -1.249 | -0.703 | -0.976 |
| 473 | 102 | 1841   | DTYMK         | -1.081 | -0.858 | -0.969 |
| 348 | 103 | 369    | ARAF1         | -1.172 | -0.750 | -0.961 |
| 526 | 104 | 1460   | CSNK2B        | -1.542 | -0.379 | -0.960 |
| 274 | 105 | 65018  | PINK1         | -1.024 | -0.893 | -0.959 |
| 444 | 106 | 6196   | RPS6KA2       | -1.283 | -0.631 | -0.957 |
| 668 | 107 | 5230   | PGK1          | -1.133 | -0.775 | -0.954 |
| 345 | 108 | 205    | AK3           | -1.161 | -0.735 | -0.948 |
| 684 | 109 | 169436 | C9ORF96       | -1.081 | -0.807 | -0.944 |
| 245 | 110 | 10420  | TESK2         | -0.704 | -1.179 | -0.942 |
| 667 | 111 | 5394   | EXOSC10       | -1.578 | -0.292 | -0.935 |
| 466 | 112 | 4215   | MAP3K3        | -1.006 | -0.864 | -0.935 |
| 293 | 113 | 91461  | LOC91461      | -1.120 | -0.744 | -0.932 |
| 514 | 114 | 23097  | CDK11         | -1.310 | -0.533 | -0.922 |

|     |     |        |           |        |        |        |
|-----|-----|--------|-----------|--------|--------|--------|
| 356 | 115 | 8518   | IKBKAP    | -1.269 | -0.566 | -0.918 |
| 431 | 116 | 64080  | RBKS      | -0.949 | -0.858 | -0.903 |
| 346 | 117 | 1459   | CSNK2A2   | -1.195 | -0.610 | -0.902 |
| 568 | 118 | 221823 | PRPS1L1   | -0.393 | -1.398 | -0.896 |
| 376 | 119 | 29993  | PACSN1    | -1.136 | -0.646 | -0.891 |
| 358 | 120 | 22858  | ICK       | -1.206 | -0.574 | -0.890 |
| 357 | 121 | 157    | ADRBK2    | -0.695 | -1.081 | -0.888 |
| 97  | 122 | 5581   | PRKCE     | -0.609 | -1.162 | -0.885 |
| 273 | 123 | 5576   | PRKAR2A   | -0.933 | -0.828 | -0.881 |
| 714 | 124 | 6300   | MAPK12    | -0.500 | -1.240 | -0.870 |
| 268 | 125 | 2324   | FLT4      | -1.117 | -0.619 | -0.868 |
| 507 | 126 | 5894   | RAF1      | -1.026 | -0.710 | -0.868 |
| 544 | 127 | 1025   | CDK9      | -0.640 | -1.092 | -0.866 |
| 296 | 128 | 84197  | FLJ23356  | -1.063 | -0.661 | -0.862 |
| 326 | 129 | 5613   | PRKX      | -1.076 | -0.646 | -0.861 |
| 125 | 130 | 9262   | STK17B    | -1.133 | -0.583 | -0.858 |
| 325 | 131 | 340156 | LOC340156 | -1.086 | -0.610 | -0.848 |
| 654 | 132 | 115701 | HAK       | -1.023 | -0.642 | -0.832 |
| 375 | 133 | 1027   | CDKN1B    | -1.122 | -0.527 | -0.824 |
| 45  | 134 | 64327  | C7ORF2    | -0.613 | -1.007 | -0.810 |
| 328 | 135 | 5575   | PRKAR1B   | -0.927 | -0.667 | -0.797 |
| 575 | 136 | 117283 | IHPK3     | -1.081 | -0.458 | -0.770 |
| 81  | 137 | 5290   | PIK3CA    | -0.416 | -1.114 | -0.765 |
| 652 | 138 | 2242   | FES       | -0.242 | -1.287 | -0.764 |
| 83  | 139 | 55577  | NAGK      | -0.384 | -1.114 | -0.749 |
| 677 | 140 | 1120   | CHKB      | -1.118 | -0.379 | -0.748 |
| 206 | 141 | 4354   | MPP1      | -1.297 | -0.199 | -0.748 |
| 403 | 142 | 203054 | ADCK5     | -1.024 | -0.455 | -0.740 |
| 423 | 143 | 8573   | CASK      | -0.965 | -0.512 | -0.739 |
| 424 | 144 | 9149   | DYRK1B    | -1.024 | -0.446 | -0.735 |
| 682 | 145 | 1030   | CDKN2B    | -1.089 | -0.379 | -0.734 |
| 377 | 146 | 1613   | DAPK3     | -0.827 | -0.610 | -0.718 |
| 35  | 147 | 64122  | FN3K      | -0.302 | -1.135 | -0.718 |
| 289 | 148 | 27148  | STK36     | -0.886 | -0.542 | -0.714 |
| 304 | 149 | 284086 | NEK8      | -0.588 | -0.822 | -0.705 |
| 8   | 150 | 5747   | PTK2      | -0.570 | -0.837 | -0.703 |
| 422 | 151 | 4058   | LTK       | -0.927 | -0.479 | -0.703 |
| 428 | 152 | 23012  | STK38L    | -0.813 | -0.574 | -0.694 |
| 446 | 153 | 131890 | GRK7      | -0.809 | -0.574 | -0.692 |
| 359 | 154 | 90956  | ADCK2     | -0.761 | -0.604 | -0.683 |

|     |     |        |         |        |        |        |
|-----|-----|--------|---------|--------|--------|--------|
| 371 | 155 | 5159   | PDGFRB  | -0.704 | -0.661 | -0.682 |
| 441 | 156 | 7048   | TGFBR2  | -0.654 | -0.703 | -0.678 |
| 297 | 157 | 5165   | PKD3    | -0.840 | -0.512 | -0.676 |
| 387 | 158 | 5566   | PRKACA  | -0.695 | -0.640 | -0.668 |
| 524 | 159 | 56848  | SPHK2   | -1.435 | 0.101  | -0.667 |
| 295 | 160 | 25778  | DUSTYPK | -1.006 | -0.306 | -0.656 |
| 416 | 161 | 9641   | IKBKE   | -0.820 | -0.488 | -0.654 |
| 626 | 162 | 23235  | SIK2    | -0.695 | -0.606 | -0.650 |
| 88  | 163 | 5562   | PRKAA1  | -0.541 | -0.756 | -0.648 |
| 674 | 164 | 8527   | DGKD    | -1.431 | 0.158  | -0.636 |
| 281 | 165 | 375449 | MAST4   | -0.616 | -0.655 | -0.635 |
| 3   | 166 | 2046   | EPHA8   | -0.432 | -0.825 | -0.628 |
| 457 | 167 | 5634   | PRPS2   | -0.895 | -0.360 | -0.627 |
| 194 | 168 | 11284  | PNKP    | -0.636 | -0.598 | -0.617 |
| 288 | 169 | 84254  | CAMKK1  | -0.986 | -0.247 | -0.616 |
| 1   | 170 | 7272   | TTK     | -0.452 | -0.780 | -0.616 |
| 347 | 171 | 7444   | VRK2    | -0.743 | -0.479 | -0.611 |
| 562 | 172 | 5063   | PAK3    | 0.045  | -1.265 | -0.610 |
| 242 | 173 | 10000  | AKT3    | -0.747 | -0.455 | -0.601 |
| 34  | 174 | 3099   | HK2     | -0.214 | -0.986 | -0.600 |
| 438 | 175 | 79646  | PANK3   | -0.620 | -0.566 | -0.593 |
| 114 | 176 | 79858  | NEK11   | -0.050 | -1.129 | -0.589 |
| 442 | 177 | 23617  | STK22B  | -0.827 | -0.351 | -0.589 |
| 384 | 178 | 83694  | RPS6KL1 | -0.881 | -0.285 | -0.583 |
| 193 | 179 | 2260   | FGFR1   | -0.802 | -0.357 | -0.579 |
| 86  | 180 | 255239 | ANKK1   | -0.377 | -0.774 | -0.576 |
| 530 | 181 | 57147  | PACE-1  | -0.367 | -0.775 | -0.571 |
| 368 | 182 | 53904  | MYO3A   | -0.886 | -0.247 | -0.566 |
| 248 | 183 | 6794   | STK11   | -0.570 | -0.560 | -0.565 |
| 341 | 184 | 3705   | ITPK1   | -0.679 | -0.446 | -0.563 |
| 462 | 185 | 1021   | CDK6    | -0.654 | -0.464 | -0.559 |
| 496 | 186 | 160851 | DGKH    | -0.544 | -0.569 | -0.557 |
| 480 | 187 | 5608   | MAP2K6  | -0.018 | -1.092 | -0.555 |
| 448 | 188 | 8558   | CDK10   | -0.597 | -0.512 | -0.555 |
| 671 | 189 | 1949   | EFNB3   | -0.334 | -0.775 | -0.554 |
| 280 | 190 | 5594   | MAPK1   | -0.761 | -0.342 | -0.551 |
| 503 | 191 | 5582   | PRKCG   | -0.172 | -0.926 | -0.549 |
| 36  | 192 | 51232  | CRIM1   | 0.138  | -1.236 | -0.549 |
| 451 | 193 | 2042   | EPHA3   | -0.650 | -0.446 | -0.548 |
| 517 | 194 | 5565   | PRKAB2  | -0.934 | -0.155 | -0.545 |

|     |     |        |          |        |        |        |
|-----|-----|--------|----------|--------|--------|--------|
| 484 | 195 | 83549  | UCK1     | -0.463 | -0.606 | -0.534 |
| 307 | 196 | 5573   | PRKAR1A  | -0.747 | -0.315 | -0.531 |
| 362 | 197 | 80122  | FLJ23074 | -0.597 | -0.455 | -0.526 |
| 388 | 198 | 2185   | PTK2B    | -0.654 | -0.387 | -0.520 |
| 262 | 199 | 4140   | MARK3    | -0.754 | -0.285 | -0.520 |
| 455 | 200 | 7006   | TEC      | -0.936 | -0.104 | -0.520 |
| 596 | 201 | 139728 | PNCK     | -0.919 | -0.108 | -0.514 |
| 584 | 202 | 9064   | MAP3K6   | -0.735 | -0.292 | -0.514 |
| 586 | 203 | 440275 | EIF2AK4  | -1.174 | 0.158  | -0.508 |
| 282 | 204 | 1160   | CKMT2    | -0.579 | -0.428 | -0.504 |
| 453 | 205 | 9807   | IHPK1    | -0.570 | -0.437 | -0.504 |
| 456 | 206 | 2395   | FRDA     | -0.734 | -0.268 | -0.501 |
| 665 | 207 | 8780   | RIOK3    | -0.783 | -0.202 | -0.493 |
| 605 | 208 | 51776  | ZAK      | -1.446 | 0.479  | -0.483 |
| 645 | 209 | 51447  | IHPK2    | -0.665 | -0.292 | -0.479 |
| 686 | 210 | 2585   | GALK2    | -0.838 | -0.108 | -0.473 |
| 430 | 211 | 5569   | PKIA     | -0.504 | -0.437 | -0.471 |
| 704 | 212 | 54822  | TRPM7    | 0.016  | -0.955 | -0.470 |
| 257 | 213 | 3656   | IRAK2    | -0.454 | -0.470 | -0.462 |
| 458 | 214 | 26289  | AK5      | -0.629 | -0.294 | -0.462 |
| 527 | 215 | 2066   | ERBB4    | -0.916 | -0.007 | -0.462 |
| 385 | 216 | 27330  | RPS6KA6  | -0.584 | -0.324 | -0.454 |
| 378 | 217 | 5295   | PIK3R1   | -0.566 | -0.333 | -0.449 |
| 44  | 218 | 7371   | UMPK     | -0.320 | -0.574 | -0.447 |
| 2   | 219 | 6850   | SYK      | -0.493 | -0.384 | -0.438 |
| 241 | 220 | 56164  | STK31    | -0.516 | -0.360 | -0.438 |
| 472 | 221 | 22853  | LMTK2    | -0.722 | -0.136 | -0.429 |
| 207 | 222 | 26353  | HSPB8    | -0.220 | -0.634 | -0.427 |
| 116 | 223 | 150094 | SNFILK   | 0.268  | -1.120 | -0.426 |
| 604 | 224 | 55872  | TOPK     | -1.258 | 0.407  | -0.426 |
| 334 | 225 | 7867   | MAPKAPK3 | -0.375 | -0.470 | -0.422 |
| 510 | 226 | 545    | ATR      | -0.257 | -0.569 | -0.413 |
| 332 | 227 | 79934  | ADCK4    | -0.225 | -0.589 | -0.407 |
| 255 | 228 | 22848  | AAK1     | -0.445 | -0.369 | -0.407 |
| 594 | 229 | 285220 | EPHA6    | -1.284 | 0.479  | -0.402 |
| 335 | 230 | 93     | ACVR2B   | -0.479 | -0.324 | -0.402 |
| 7   | 231 | 65268  | PRKWNK2  | -0.027 | -0.768 | -0.398 |
| 343 | 232 | 5260   | PHKG1    | -0.500 | -0.294 | -0.397 |
| 685 | 233 | 5604   | MAP2K1   | -0.776 | -0.007 | -0.392 |
| 414 | 234 | 10595  | ERN2     | -0.695 | -0.083 | -0.389 |

|     |     |        |              |        |        |        |
|-----|-----|--------|--------------|--------|--------|--------|
| 185 | 235 | 10188  | TNK2         | 0.048  | -0.807 | -0.380 |
| 516 | 236 | 57410  | SCYL1        | -1.162 | 0.407  | -0.378 |
| 305 | 237 | 2710   | GK           | -0.538 | -0.208 | -0.373 |
| 118 | 238 | 9113   | LATS1        | 0.138  | -0.878 | -0.370 |
| 432 | 239 | 5255   | PHKA1        | -0.831 | 0.096  | -0.368 |
| 623 | 240 | 5128   | PCTK2        | -0.165 | -0.569 | -0.367 |
| 5   | 241 | 80347  | COASY        | -0.427 | -0.303 | -0.365 |
| 106 | 242 | 6787   | NEK4         | -0.227 | -0.497 | -0.362 |
| 271 | 243 | 2051   | EPHB6        | -0.486 | -0.238 | -0.362 |
| 702 | 244 | 2712   | GK2          | -0.117 | -0.606 | -0.361 |
| 572 | 245 | 1119   | CHKA         | -0.297 | -0.418 | -0.358 |
| 124 | 246 | 122481 | AK7          | -0.400 | -0.312 | -0.356 |
| 603 | 247 | 2965   | GTF2H1       | -0.754 | 0.047  | -0.354 |
| 687 | 248 | 4914   | NTRK1        | -0.596 | -0.108 | -0.352 |
| 646 | 249 | 3611   | ILK          | -0.544 | -0.155 | -0.350 |
| 284 | 250 | 92     | ACVR2        | -0.815 | 0.135  | -0.340 |
| 250 | 251 | 6046   | BRD2         | -0.386 | -0.294 | -0.340 |
| 143 | 252 | 65061  | ALS2CR7      | -0.270 | -0.399 | -0.335 |
| 413 | 253 | 29110  | TBK1         | -0.547 | -0.116 | -0.331 |
| 412 | 254 | 1432   | MAPK14       | -0.357 | -0.306 | -0.331 |
| 703 | 255 | 91419  | KUB3         | 0.351  | -1.013 | -0.331 |
| 531 | 256 | 3551   | IKBKB        | -0.047 | -0.606 | -0.326 |
| 386 | 257 | 6732   | SRPK1        | -0.845 | 0.200  | -0.322 |
| 539 | 258 | 9748   | SLK          | 0.071  | -0.710 | -0.320 |
| 525 | 259 | 7016   | TESK1        | -0.960 | 0.342  | -0.309 |
| 252 | 260 | 5606   | MAP2K3       | -0.398 | -0.220 | -0.309 |
| 663 | 261 | 5591   | PRKDC        | -0.367 | -0.249 | -0.308 |
| 383 | 262 | 5754   | PTK7         | -0.538 | -0.050 | -0.294 |
| 696 | 263 | 4356   | MPP3         | -0.334 | -0.249 | -0.291 |
| 352 | 264 | 83942  | STK22D       | -0.743 | 0.162  | -0.291 |
| 369 | 265 | 8877   | SPHK1        | -0.715 | 0.135  | -0.290 |
| 228 | 266 | 9863   | AIP1         | 0.216  | -0.792 | -0.288 |
| 697 | 267 | 1018   | CDK3         | -0.507 | -0.058 | -0.282 |
| 261 | 268 | 8536   | CAMK1        | -0.413 | -0.148 | -0.281 |
| 204 | 269 | 10922  | FASTK        | 0.195  | -0.756 | -0.281 |
| 85  | 270 | 29904  | EEF2K        | -0.241 | -0.312 | -0.277 |
| 643 | 271 | 51765  | RP6-213H19.1 | -0.172 | -0.379 | -0.275 |
| 440 | 272 | 1196   | CLK2         | -0.363 | -0.178 | -0.271 |
| 82  | 273 | 84451  | KIAA1804     | -0.436 | -0.095 | -0.265 |
| 555 | 274 | 6725   | SRMS         | -0.065 | -0.458 | -0.262 |

|     |     |        |          |        |        |        |
|-----|-----|--------|----------|--------|--------|--------|
| 391 | 275 | 64710  | NUCKS    | -2.114 | 1.595  | -0.260 |
| 417 | 276 | 122011 | CSNK1A1L | -0.450 | -0.059 | -0.254 |
| 254 | 277 | 10518  | CIB2     | -0.363 | -0.136 | -0.250 |
| 415 | 278 | 5584   | PRKCI    | -0.470 | -0.026 | -0.248 |
| 673 | 279 | 5579   | PRKCB1   | -0.967 | 0.479  | -0.244 |
| 342 | 280 | 1969   | EPHA2    | -0.391 | -0.092 | -0.241 |
| 582 | 281 | 4117   | MAK      | -0.422 | -0.058 | -0.240 |
| 272 | 282 | 4139   | MARK1    | -0.641 | 0.162  | -0.239 |
| 249 | 283 | 3717   | JAK2     | -0.500 | 0.022  | -0.239 |
| 489 | 284 | 8621   | CDC2L5   | -0.275 | -0.202 | -0.239 |
| 6   | 285 | 140469 | MYO3B    | -0.139 | -0.330 | -0.234 |
| 187 | 286 | 558    | AXL      | 0.100  | -0.545 | -0.222 |
| 581 | 287 | 4831   | NME2     | -0.139 | -0.292 | -0.216 |
| 173 | 288 | 699    | BUB1     | -0.207 | -0.187 | -0.197 |
| 291 | 289 | 7046   | TGFBR1   | -0.561 | 0.174  | -0.194 |
| 452 | 290 | 5832   | PYCS     | -0.584 | 0.200  | -0.192 |
| 402 | 291 | 9414   | TJP2     | -0.665 | 0.287  | -0.189 |
| 27  | 292 | 51265  | CDKL3    | 0.359  | -0.735 | -0.188 |
| 546 | 293 | 1399   | CRKL     | -0.533 | 0.158  | -0.187 |
| 506 | 294 | 2041   | EPHA1    | -0.993 | 0.627  | -0.183 |
| 263 | 295 | 167359 | MGC42105 | -0.386 | 0.022  | -0.182 |
| 309 | 296 | 4920   | ROR2     | -0.184 | -0.178 | -0.181 |
| 678 | 297 | 5577   | PRKAR2B  | -0.691 | 0.342  | -0.175 |
| 666 | 298 | 85443  | KIAA1765 | -1.052 | 0.706  | -0.173 |
| 382 | 299 | 26576  | STK23    | -0.525 | 0.188  | -0.168 |
| 199 | 300 | 91754  | NEK9     | 0.334  | -0.655 | -0.161 |
| 504 | 301 | 11329  | STK38    | -0.724 | 0.407  | -0.159 |
| 660 | 302 | 2987   | GUK1     | -0.065 | -0.249 | -0.157 |
| 303 | 303 | 8566   | PDXK     | -0.275 | -0.038 | -0.156 |
| 95  | 304 | 5681   | PSKH1    | 0.431  | -0.735 | -0.152 |
| 113 | 305 | 85366  | MYLK2    | -0.361 | 0.066  | -0.147 |
| 464 | 306 | 5588   | PRKCQ    | -0.177 | -0.116 | -0.146 |
| 321 | 307 | 4296   | MAP3K11  | 0.025  | -0.276 | -0.126 |
| 379 | 308 | 5616   | PRKY     | -0.423 | 0.174  | -0.124 |
| 583 | 309 | 5293   | PIK3CD   | -0.165 | -0.058 | -0.111 |
| 115 | 310 | 57551  | KIAA1361 | -0.277 | 0.066  | -0.105 |
| 258 | 311 | 130399 | ACVR1C   | -0.466 | 0.257  | -0.104 |
| 560 | 312 | 9833   | MELK     | 0.292  | -0.497 | -0.103 |
| 463 | 313 | 1032   | CDKN2D   | -0.391 | 0.188  | -0.101 |
| 642 | 314 | 9942   | XYLB     | 0.137  | -0.335 | -0.099 |



|     |     |        |          |        |        |        |
|-----|-----|--------|----------|--------|--------|--------|
| 595 | 315 | 2984   | GUCY2C   | -0.824 | 0.627  | -0.098 |
| 408 | 316 | 80216  | LAK      | -0.198 | 0.010  | -0.094 |
| 315 | 317 | 6198   | RPS6KB1  | -0.402 | 0.215  | -0.093 |
| 420 | 318 | 56155  | TEX14    | -0.177 | -0.002 | -0.090 |
| 591 | 319 | 5313   | PKLR     | -0.172 | -0.007 | -0.090 |
| 593 | 320 | 7443   | VRK1     | -0.393 | 0.216  | -0.088 |
| 54  | 321 | 1164   | CKS2     | -0.302 | 0.156  | -0.073 |
| 497 | 322 | 2444   | FRK      | -0.073 | -0.058 | -0.065 |
| 607 | 323 | 1147   | CHUK     | -0.161 | 0.047  | -0.057 |
| 692 | 324 | 9874   | TLK1     | -0.452 | 0.342  | -0.055 |
| 543 | 325 | 5105   | PCK1     | 0.225  | -0.335 | -0.055 |
| 528 | 326 | 5210   | PFKFB4   | -0.209 | 0.101  | -0.054 |
| 107 | 327 | 53944  | CSNK1G1  | 0.431  | -0.530 | -0.049 |
| 117 | 328 | 5756   | PTK9     | -0.416 | 0.323  | -0.047 |
| 676 | 329 | 166614 | MGC45428 | -0.500 | 0.407  | -0.046 |
| 142 | 330 | 51086  | TNNI3K   | 0.247  | -0.339 | -0.046 |
| 532 | 331 | 9175   | MAP3K13  | -0.367 | 0.277  | -0.045 |
| 105 | 332 | 6714   | SRC      | -0.002 | -0.083 | -0.043 |
| 373 | 333 | 4919   | ROR1     | -0.593 | 0.510  | -0.041 |
| 548 | 334 | 282974 | STK32C   | 0.255  | -0.335 | -0.040 |
| 191 | 335 | 3718   | JAK3     | 0.431  | -0.506 | -0.037 |
| 397 | 336 | 659    | BMPR2    | -0.311 | 0.242  | -0.035 |
| 585 | 337 | 676    | BRDT     | -0.680 | 0.627  | -0.027 |
| 439 | 338 | 6733   | SRPK2    | -0.282 | 0.230  | -0.026 |
| 411 | 339 | 124923 | FLJ25006 | -0.114 | 0.069  | -0.022 |
| 429 | 340 | 83931  | MGC4796  | -0.491 | 0.460  | -0.015 |
| 176 | 341 | 5298   | PIK4CB   | 0.186  | -0.217 | -0.015 |
| 198 | 342 | 3480   | IGF1R    | 0.109  | -0.136 | -0.014 |
| 349 | 343 | 613    | BCR      | -0.357 | 0.332  | -0.013 |
| 63  | 344 | 55750  | MULK     | 0.418  | -0.440 | -0.011 |
| 614 | 345 | 9451   | EIF2AK3  | -0.297 | 0.277  | -0.010 |
| 401 | 346 | 11011  | TLK2     | -0.318 | 0.302  | -0.008 |
| 574 | 347 | 6195   | RPS6KA1  | 0.450  | -0.458 | -0.004 |
| 317 | 348 | 146057 | TTBK2    | -0.352 | 0.346  | -0.003 |
| 48  | 349 | 23683  | PRKCN    | 0.302  | -0.265 | 0.019  |
| 336 | 350 | 1956   | EGFR     | -0.123 | 0.162  | 0.019  |
| 672 | 351 | 2049   | EPHB3    | -0.584 | 0.627  | 0.021  |
| 658 | 352 | 805    | CALM2    | 0.056  | -0.007 | 0.024  |
| 598 | 353 | 5156   | PDGFRA   | -0.165 | 0.216  | 0.026  |
| 299 | 354 | 64768  | C9ORF12  | -0.509 | 0.564  | 0.028  |

|     |     |        |          |        |        |       |
|-----|-----|--------|----------|--------|--------|-------|
| 339 | 355 | 4921   | DDR2     | 0.150  | -0.092 | 0.029 |
| 337 | 356 | 6098   | ROS1     | -0.286 | 0.346  | 0.030 |
| 259 | 357 | 91     | ACVR1B   | 0.043  | 0.022  | 0.032 |
| 333 | 358 | 27102  | HRI      | 0.043  | 0.034  | 0.038 |
| 533 | 359 | 57118  | CAMK1D   | -0.330 | 0.407  | 0.038 |
| 542 | 360 | 5211   | PFKL     | 0.369  | -0.292 | 0.039 |
| 292 | 361 | 8941   | CDK5R2   | -0.218 | 0.302  | 0.042 |
| 617 | 362 | 5287   | PIK3C2B  | -0.316 | 0.407  | 0.046 |
| 522 | 363 | 11035  | RIPK3    | -0.124 | 0.216  | 0.046 |
| 537 | 364 | 6789   | STK4     | -0.249 | 0.342  | 0.046 |
| 47  | 365 | 9448   | MAP4K4   | 0.302  | -0.208 | 0.047 |
| 602 | 366 | 202374 | STK32A   | -0.452 | 0.551  | 0.050 |
| 26  | 367 | 50488  | MINK     | 0.166  | -0.062 | 0.052 |
| 655 | 368 | 1017   | CDK2     | 0.163  | -0.058 | 0.053 |
| 89  | 369 | 8986   | RPS6KA4  | 0.256  | -0.136 | 0.060 |
| 197 | 370 | 55224  | FLJ10761 | 0.032  | 0.090  | 0.061 |
| 330 | 371 | 5570   | PKIB     | 0.034  | 0.096  | 0.065 |
| 474 | 372 | 30849  | PIK3R4   | -0.093 | 0.230  | 0.068 |
| 597 | 373 | 51231  | VRK3     | -0.397 | 0.551  | 0.077 |
| 112 | 374 | 5164   | PDK2     | 0.057  | 0.105  | 0.081 |
| 523 | 375 | 54986  | ULK4     | -0.463 | 0.627  | 0.082 |
| 693 | 376 | 5213   | PFKM     | -0.378 | 0.551  | 0.086 |
| 695 | 377 | 3707   | ITPKB    | 0.078  | 0.101  | 0.089 |
| 670 | 378 | 1263   | PLK3     | 0.148  | 0.047  | 0.097 |
| 418 | 379 | 8394   | PIP5K1A  | -0.136 | 0.332  | 0.098 |
| 24  | 380 | 27     | ABL2     | 0.084  | 0.117  | 0.100 |
| 632 | 381 | 8550   | MAPKAPK5 | 0.538  | -0.335 | 0.102 |
| 683 | 382 | 1739   | DLG1     | -0.492 | 0.706  | 0.107 |
| 612 | 383 | 11200  | CHEK2    | -0.179 | 0.407  | 0.114 |
| 56  | 384 | 5598   | MAPK7    | 0.511  | -0.273 | 0.119 |
| 310 | 385 | 79837  | PIP5K2C  | -0.232 | 0.478  | 0.123 |
| 534 | 386 | 11213  | IRAK3    | -0.305 | 0.551  | 0.123 |
| 512 | 387 | 3791   | KDR      | -0.934 | 1.185  | 0.126 |
| 205 | 388 | 5593   | PRKG2    | 0.443  | -0.178 | 0.132 |
| 535 | 389 | 4342   | MOS      | -0.283 | 0.551  | 0.134 |
| 38  | 390 | 83983  | SSTK     | 0.075  | 0.194  | 0.135 |
| 37  | 391 | 5297   | PIK4CA   | 0.345  | -0.071 | 0.137 |
| 290 | 392 | 5599   | MAPK8    | 0.086  | 0.188  | 0.137 |
| 398 | 393 | 340371 | NRBP2    | 0.113  | 0.174  | 0.143 |
| 538 | 394 | 9223   | BAIAP1   | 0.303  | -0.007 | 0.148 |

|     |     |        |              |        |        |       |
|-----|-----|--------|--------------|--------|--------|-------|
| 238 | 395 | 7525   | YES1         | 0.690  | -0.366 | 0.162 |
| 318 | 396 | 8476   | CDC42BPA     | 0.141  | 0.188  | 0.165 |
| 653 | 397 | 5564   | PRKAB1       | 0.284  | 0.047  | 0.166 |
| 300 | 398 | 5753   | PTK6         | -0.232 | 0.564  | 0.166 |
| 133 | 399 | 54963  | URKL1        | 0.177  | 0.156  | 0.166 |
| 476 | 400 | 2048   | EPHB2        | 0.009  | 0.332  | 0.170 |
| 127 | 401 | 9950   | GOLGA5       | 0.595  | -0.247 | 0.174 |
| 713 | 402 | 8859   | STK19        | 0.815  | -0.458 | 0.178 |
| 588 | 403 | 1859   | DYRK1A       | -0.264 | 0.627  | 0.181 |
| 184 | 404 | 5601   | MAPK9        | 0.381  | -0.017 | 0.182 |
| 579 | 405 | 390226 | LOC390226    | 0.789  | -0.418 | 0.185 |
| 351 | 406 | 93627  | MGC16169     | 0.043  | 0.332  | 0.187 |
| 338 | 407 | 3101   | HK3          | 0.034  | 0.346  | 0.190 |
| 360 | 408 | 55300  | PI4K2B       | 0.034  | 0.346  | 0.190 |
| 251 | 409 | 1031   | CDKN2C       | -0.130 | 0.510  | 0.190 |
| 712 | 410 | 60385  | TSKS         | 0.630  | -0.249 | 0.191 |
| 656 | 411 | 5605   | MAP2K2       | 0.225  | 0.158  | 0.192 |
| 395 | 412 | 9943   | OSR1         | -0.329 | 0.719  | 0.195 |
| 578 | 413 | 5062   | PAK2         | 0.292  | 0.101  | 0.196 |
| 700 | 414 | 2043   | EPHA4        | 0.410  | -0.007 | 0.201 |
| 576 | 415 | 660    | BMX          | 0.130  | 0.277  | 0.204 |
| 316 | 416 | 55312  | RFK          | -0.211 | 0.621  | 0.205 |
| 625 | 417 | 147746 | HIPK4        | 0.310  | 0.101  | 0.205 |
| 43  | 418 | 3984   | LIMK1        | 0.334  | 0.078  | 0.206 |
| 536 | 419 | 8396   | PIP5K2B      | -0.139 | 0.551  | 0.206 |
| 186 | 420 | 149420 | PDIK1L       | 0.456  | -0.038 | 0.209 |
| 331 | 421 | 1020   | CDK5         | 0.025  | 0.394  | 0.209 |
| 688 | 422 | 4833   | NME4         | -0.194 | 0.627  | 0.216 |
| 175 | 423 | 5587   | PRKCM        | 0.216  | 0.236  | 0.226 |
| 498 | 424 | 5291   | PIK3CB       | 0.181  | 0.277  | 0.229 |
| 31  | 425 | 983    | CDC2         | 0.538  | -0.071 | 0.234 |
| 465 | 426 | 51422  | PRKAG2       | -0.184 | 0.659  | 0.238 |
| 138 | 427 | 3815   | KIT          | 0.795  | -0.312 | 0.241 |
| 518 | 428 | 83931  | MGC4796      | 0.016  | 0.479  | 0.247 |
| 181 | 429 | 1454   | CSNK1E       | 0.497  | 0.019  | 0.258 |
| 39  | 430 | 9344   | TAO1         | 0.302  | 0.221  | 0.262 |
| 577 | 431 | 57396  | CLK4         | 0.310  | 0.216  | 0.263 |
| 615 | 432 | 5289   | PIK3C3       | -0.172 | 0.706  | 0.267 |
| 137 | 433 | 55450  | CAMKIINALPHA | 0.674  | -0.136 | 0.269 |
| 104 | 434 | 8382   | NME5         | 0.302  | 0.236  | 0.269 |

|     |     |        |           |        |        |       |
|-----|-----|--------|-----------|--------|--------|-------|
| 467 | 435 | 53834  | FGFRL1    | -0.007 | 0.546  | 0.270 |
| 662 | 436 | 8491   | MAP4K3    | -0.010 | 0.551  | 0.270 |
| 634 | 437 | 5208   | PFKFB2    | 0.653  | -0.108 | 0.272 |
| 164 | 438 | 1608   | DGKG      | 0.524  | 0.031  | 0.277 |
| 556 | 439 | 5871   | MAP4K2    | 0.399  | 0.158  | 0.278 |
| 55  | 440 | 5261   | PHKG2     | 0.279  | 0.278  | 0.279 |
| 64  | 441 | 2870   | GRK6      | 0.497  | 0.066  | 0.282 |
| 657 | 442 | 5602   | MAPK10    | 0.016  | 0.551  | 0.283 |
| 505 | 443 | 10654  | PMVK      | -0.607 | 1.185  | 0.289 |
| 136 | 444 | 10645  | CAMKK2    | 0.674  | -0.095 | 0.290 |
| 407 | 445 | 5607   | MAP2K5    | -0.039 | 0.621  | 0.291 |
| 622 | 446 | 11184  | MAP4K1    | 0.104  | 0.479  | 0.292 |
| 165 | 447 | 23031  | MAST3     | 0.443  | 0.141  | 0.292 |
| 135 | 448 | 3000   | GUCY2D    | 0.690  | -0.104 | 0.293 |
| 545 | 449 | 2264   | FGFR4     | 0.255  | 0.342  | 0.299 |
| 694 | 450 | 5563   | PRKAA2    | -0.179 | 0.793  | 0.307 |
| 370 | 451 | 10926  | ASK       | 0.188  | 0.427  | 0.308 |
| 57  | 452 | 131096 | KCNH8     | 0.931  | -0.312 | 0.309 |
| 53  | 453 | 1456   | CSNK1G3   | 0.157  | 0.463  | 0.310 |
| 167 | 454 | 10295  | BCKDK     | 0.511  | 0.129  | 0.320 |
| 421 | 455 | 9261   | MAPKAPK2  | -0.032 | 0.677  | 0.323 |
| 33  | 456 | 120892 | LRRK2     | 0.177  | 0.481  | 0.329 |
| 381 | 457 | 7535   | ZAP70     | 0.077  | 0.582  | 0.329 |
| 121 | 458 | 55781  | RIOK2     | 0.381  | 0.278  | 0.330 |
| 509 | 459 | 5580   | PRKCD     | -0.216 | 0.883  | 0.333 |
| 647 | 460 | 85481  | PSKH2     | 0.262  | 0.407  | 0.335 |
| 214 | 461 | 1326   | MAP3K8    | 0.406  | 0.263  | 0.335 |
| 301 | 462 | 5058   | PAK1      | -0.157 | 0.826  | 0.335 |
| 449 | 463 | 1026   | CDKN1A    | 0.018  | 0.659  | 0.339 |
| 103 | 464 | 5218   | PFTK1     | 0.227  | 0.463  | 0.345 |
| 571 | 465 | 51727  | UMP-CMPK  | 0.605  | 0.101  | 0.353 |
| 215 | 466 | 1024   | CDK8      | 0.776  | -0.062 | 0.357 |
| 302 | 467 | 6259   | RYK       | 0.095  | 0.639  | 0.367 |
| 601 | 468 | 5286   | PIK3C2A   | 0.038  | 0.706  | 0.372 |
| 394 | 469 | 79834  | KIAA2002  | 0.050  | 0.698  | 0.374 |
| 163 | 470 | 23533  | P101-PI3K | 0.334  | 0.415  | 0.374 |
| 459 | 471 | 23139  | MAST2     | 0.338  | 0.427  | 0.383 |
| 166 | 472 | 1944   | EFNA3     | 0.256  | 0.513  | 0.385 |
| 573 | 473 | 65266  | WNK4      | 0.505  | 0.277  | 0.391 |
| 640 | 474 | 55728  | N4BP2     | 0.737  | 0.047  | 0.392 |

|     |     |        |           |        |        |       |
|-----|-----|--------|-----------|--------|--------|-------|
| 511 | 475 | 815    | CAMK2A    | 0.630  | 0.158  | 0.394 |
| 520 | 476 | 10454  | MAP3K7IP1 | -0.080 | 0.883  | 0.401 |
| 58  | 477 | 817    | CAMK2D    | 0.849  | -0.038 | 0.406 |
| 182 | 478 | 5970   | RELA      | 0.758  | 0.066  | 0.412 |
| 192 | 479 | 83942  | STK22D    | 0.642  | 0.183  | 0.412 |
| 311 | 480 | 90     | ACVR1     | 0.000  | 0.826  | 0.413 |
| 183 | 481 | 23552  | CCRK      | 0.497  | 0.352  | 0.425 |
| 613 | 482 | 3716   | JAK1      | -0.010 | 0.883  | 0.436 |
| 211 | 483 | 6197   | RPS6KA3   | 0.758  | 0.117  | 0.438 |
| 641 | 484 | 4750   | NEK1      | 0.664  | 0.216  | 0.440 |
| 675 | 485 | 2050   | EPHB4     | -0.305 | 1.185  | 0.440 |
| 123 | 486 | 5157   | PDGFRL    | 0.674  | 0.209  | 0.442 |
| 547 | 487 | 9252   | RPS6KA5   | 0.351  | 0.551  | 0.451 |
| 134 | 488 | 4293   | MAP3K9    | 0.581  | 0.323  | 0.452 |
| 392 | 489 | 11113  | CIT       | 0.197  | 0.719  | 0.458 |
| 42  | 490 | 2869   | GRK5      | 0.722  | 0.221  | 0.472 |
| 174 | 491 | 127933 | UHMK1     | 0.595  | 0.367  | 0.481 |
| 312 | 492 | 5567   | PRKACB    | 0.270  | 0.698  | 0.484 |
| 580 | 493 | 1452   | CSNK1A1   | 0.432  | 0.551  | 0.491 |
| 314 | 494 | 4145   | MATK      | -0.048 | 1.044  | 0.498 |
| 450 | 495 | 80025  | PANK2     | 0.034  | 0.966  | 0.500 |
| 494 | 496 | 5603   | MAPK13    | 0.303  | 0.706  | 0.504 |
| 479 | 497 | 5979   | RET       | 0.350  | 0.659  | 0.504 |
| 627 | 498 | 4233   | MET       | 0.737  | 0.277  | 0.507 |
| 132 | 499 | 818    | CAMK2G    | 0.795  | 0.221  | 0.508 |
| 41  | 500 | 53632  | PRKAG3    | 0.345  | 0.680  | 0.513 |
| 111 | 501 | 84446  | KIAA1811  | 0.795  | 0.236  | 0.515 |
| 396 | 502 | 5891   | RAGE      | 0.229  | 0.805  | 0.517 |
| 168 | 503 | 3706   | ITPKA     | 0.256  | 0.782  | 0.519 |
| 69  | 504 | 8576   | STK16     | 0.849  | 0.194  | 0.522 |
| 15  | 505 | 84930  | MASTL     | 0.538  | 0.531  | 0.535 |
| 177 | 506 | 1742   | DLG4      | 0.795  | 0.278  | 0.536 |
| 209 | 507 | 8445   | DYRK2     | 0.813  | 0.278  | 0.545 |
| 502 | 508 | 9625   | AATK      | -0.334 | 1.427  | 0.546 |
| 234 | 509 | 10733  | PLK4      | 0.994  | 0.117  | 0.556 |
| 492 | 510 | 112858 | TP53RK    | 1.072  | 0.047  | 0.559 |
| 28  | 511 | 9020   | MAP3K14   | 0.951  | 0.168  | 0.559 |
| 587 | 512 | 10201  | NME6      | -0.179 | 1.301  | 0.561 |
| 189 | 513 | 8737   | RIPK1     | 0.484  | 0.641  | 0.562 |
| 203 | 514 | 1612   | DAPK1     | 0.931  | 0.194  | 0.563 |

|     |     |        |         |       |        |       |
|-----|-----|--------|---------|-------|--------|-------|
| 108 | 515 | 83732  | RIOK1   | 0.974 | 0.156  | 0.565 |
| 213 | 516 | 57143  | ADCK1   | 1.042 | 0.090  | 0.566 |
| 66  | 517 | 65975  | STK33   | 1.090 | 0.042  | 0.566 |
| 690 | 518 | 23178  | PASK    | 0.726 | 0.407  | 0.567 |
| 16  | 519 | 10221  | TRIB1   | 0.951 | 0.194  | 0.573 |
| 410 | 520 | 79705  | LRRK1   | 0.499 | 0.659  | 0.579 |
| 52  | 521 | 53354  | PANK1   | 0.910 | 0.251  | 0.581 |
| 172 | 522 | 4355   | MPP2    | 0.931 | 0.236  | 0.584 |
| 470 | 523 | 9024   | STK29   | 0.409 | 0.761  | 0.585 |
| 637 | 524 | 260425 | MAGI-3  | 0.549 | 0.627  | 0.588 |
| 659 | 525 | 3795   | KHK     | 1.234 | -0.058 | 0.588 |
| 178 | 526 | 695    | BTK     | 0.674 | 0.513  | 0.594 |
| 680 | 527 | 269    | AMHR2   | 0.572 | 0.627  | 0.599 |
| 471 | 528 | 4916   | NTRK3   | 0.281 | 0.919  | 0.600 |
| 32  | 529 | 11040  | PIM2    | 0.740 | 0.463  | 0.601 |
| 128 | 530 | 8428   | STK24   | 0.931 | 0.278  | 0.604 |
| 145 | 531 | 1163   | CKS1B   | 1.194 | 0.019  | 0.606 |
| 621 | 532 | 30811  | HUNK    | 0.538 | 0.706  | 0.622 |
| 188 | 533 | 54101  | ANKRD3  | 0.642 | 0.603  | 0.623 |
| 212 | 534 | 1945   | EFNA4   | 1.090 | 0.168  | 0.629 |
| 409 | 535 | 1022   | CDK7    | 0.209 | 1.071  | 0.640 |
| 715 | 536 | 2584   | GALK1   | 0.881 | 0.407  | 0.644 |
| 236 | 537 | 7301   | TYRO3   | 0.890 | 0.400  | 0.645 |
| 313 | 538 | 27347  | STK39   | 0.170 | 1.127  | 0.649 |
| 521 | 539 | 5610   | PRKR    | 0.321 | 0.976  | 0.649 |
| 202 | 540 | 5305   | PIP5K2A | 0.931 | 0.367  | 0.649 |
| 49  | 541 | 84630  | TTBK1   | 0.890 | 0.415  | 0.652 |
| 679 | 542 | 5106   | PCK2    | 0.016 | 1.301  | 0.658 |
| 393 | 543 | 344387 | CDKL4   | 0.327 | 0.993  | 0.660 |
| 67  | 544 | 57538  | MIDORI  | 1.194 | 0.129  | 0.662 |
| 237 | 545 | 5595   | MAPK3   | 1.342 | -0.017 | 0.662 |
| 708 | 546 | 4486   | MST1R   | 1.433 | -0.108 | 0.662 |
| 701 | 547 | 9201   | DCAMKL1 | 1.234 | 0.101  | 0.667 |
| 217 | 548 | 5288   | PIK3C2G | 1.090 | 0.263  | 0.676 |
| 13  | 549 | 9061   | PAPSS1  | 1.065 | 0.293  | 0.679 |
| 169 | 550 | 10783  | NEK6    | 0.511 | 0.871  | 0.691 |
| 260 | 551 | 8895   | CPNE3   | 0.043 | 1.339  | 0.691 |
| 225 | 552 | 57172  | CAMK1G  | 1.278 | 0.105  | 0.692 |
| 23  | 553 | 132    | ADK     | 0.627 | 0.761  | 0.694 |
| 529 | 554 | 9088   | PKMYT1  | 0.310 | 1.077  | 0.694 |

|     |     |        |          |        |        |       |
|-----|-----|--------|----------|--------|--------|-------|
| 146 | 555 | 55589  | BMP2K    | 1.140  | 0.251  | 0.695 |
| 218 | 556 | 1019   | CDK4     | 1.167  | 0.236  | 0.702 |
| 478 | 557 | 1741   | DLG3     | -0.071 | 1.479  | 0.704 |
| 711 | 558 | 65125  | PRKWNK1  | 1.010  | 0.407  | 0.708 |
| 216 | 559 | 8569   | MKNK1    | 1.065  | 0.352  | 0.709 |
| 65  | 560 | 658    | BMPR1B   | 1.140  | 0.278  | 0.709 |
| 706 | 561 | 2986   | GUCY2F   | 0.538  | 0.883  | 0.711 |
| 19  | 562 | 3098   | HK1      | 0.890  | 0.531  | 0.711 |
| 17  | 563 | 8019   | BRD3     | 1.042  | 0.382  | 0.712 |
| 219 | 564 | 5292   | PIM1     | 1.017  | 0.415  | 0.716 |
| 144 | 565 | 3055   | HCK      | 1.222  | 0.221  | 0.721 |
| 558 | 566 | 5163   | PDK1     | 0.965  | 0.479  | 0.722 |
| 141 | 567 | 2872   | MKNK2    | 0.706  | 0.740  | 0.723 |
| 14  | 568 | 5596   | MAPK4    | 0.722  | 0.740  | 0.731 |
| 18  | 569 | 197259 | FLJ34389 | 0.974  | 0.513  | 0.744 |
| 109 | 570 | 207    | AKT1     | 0.870  | 0.641  | 0.756 |
| 119 | 571 | 5214   | PFKP     | 0.813  | 0.701  | 0.757 |
| 628 | 572 | 2534   | FYN      | 1.120  | 0.407  | 0.764 |
| 93  | 573 | 2044   | EPHA5    | 0.849  | 0.680  | 0.765 |
| 40  | 574 | 4832   | NME3     | 0.795  | 0.740  | 0.767 |
| 9   | 575 | 2241   | FER      | 0.256  | 1.297  | 0.777 |
| 96  | 576 | 6795   | AURKC    | 1.310  | 0.263  | 0.787 |
| 611 | 577 | 114783 | LMTK3    | 0.273  | 1.301  | 0.787 |
| 618 | 578 | 6446   | SGK      | 0.505  | 1.077  | 0.791 |
| 495 | 579 | 28951  | TRIB2    | 0.881  | 0.706  | 0.793 |
| 94  | 580 | 91807  | MLCK     | 0.994  | 0.624  | 0.809 |
| 468 | 581 | 4830   | NME1     | 0.692  | 0.942  | 0.817 |
| 224 | 582 | 138474 | TAFIL    | 1.478  | 0.168  | 0.823 |
| 569 | 583 | 3482   | IGF2R    | 1.827  | -0.155 | 0.836 |
| 101 | 584 | 9060   | PAPSS2   | 1.478  | 0.194  | 0.836 |
| 380 | 585 | 4214   | MAP3K1   | 0.629  | 1.044  | 0.836 |
| 475 | 586 | 2645   | GCK      | 0.338  | 1.339  | 0.839 |
| 319 | 587 | 83903  | GSG2     | 0.742  | 0.942  | 0.842 |
| 681 | 588 | 63904  | DUSP21   | 0.505  | 1.185  | 0.845 |
| 102 | 589 | 6199   | RPS6KB2  | 0.831  | 0.871  | 0.851 |
| 131 | 590 | 8317   | CDC7     | 0.994  | 0.719  | 0.857 |
| 270 | 591 | 5609   | MAP2K7   | 0.188  | 1.556  | 0.872 |
| 460 | 592 | 8851   | CDK5R1   | 0.197  | 1.556  | 0.877 |
| 540 | 593 | 1028   | CDKN1C   | 0.965  | 0.793  | 0.879 |
| 147 | 594 | 5257   | PHKB     | 1.278  | 0.481  | 0.879 |

|     |     |        |          |       |       |       |
|-----|-----|--------|----------|-------|-------|-------|
| 21  | 595 | 55437  | ALS2CR2  | 0.951 | 0.826 | 0.889 |
| 221 | 596 | 7786   | MAP3K12  | 1.115 | 0.680 | 0.898 |
| 552 | 597 | 23412  | COMMD3   | 1.532 | 0.277 | 0.905 |
| 227 | 598 | 6793   | STK10    | 1.278 | 0.549 | 0.914 |
| 541 | 599 | 23396  | PIP5K1C  | 1.617 | 0.216 | 0.917 |
| 389 | 600 | 10461  | MERTK    | 0.540 | 1.306 | 0.923 |
| 99  | 601 | 140803 | TRPM6    | 1.249 | 0.603 | 0.926 |
| 29  | 602 | 6885   | MAP3K7   | 0.870 | 0.987 | 0.928 |
| 129 | 603 | 1607   | DGKB     | 1.140 | 0.719 | 0.929 |
| 92  | 604 | 80271  | ITPKC    | 1.042 | 0.826 | 0.934 |
| 553 | 605 | 7084   | TK2      | 1.532 | 0.342 | 0.937 |
| 11  | 606 | 94     | ACVRL1   | 0.890 | 0.987 | 0.939 |
| 635 | 607 | 57787  | MARK4    | 0.815 | 1.077 | 0.946 |
| 231 | 608 | 79672  | FN3KRP   | 0.910 | 0.987 | 0.949 |
| 500 | 609 | 8814   | CDKL1    | 0.829 | 1.077 | 0.953 |
| 239 | 610 | 89882  | NYD-SP25 | 0.994 | 0.916 | 0.955 |
| 419 | 611 | 9263   | STK17A   | 0.397 | 1.518 | 0.957 |
| 12  | 612 | 4067   | LYN      | 1.042 | 0.892 | 0.967 |
| 200 | 613 | 84197  | FLJ23356 | 0.813 | 1.148 | 0.980 |
| 709 | 614 | 204    | AK2      | 1.415 | 0.551 | 0.983 |
| 609 | 615 | 283629 | C14ORF20 | 1.577 | 0.407 | 0.992 |
| 631 | 616 | 4751   | NEK2     | 1.433 | 0.551 | 0.992 |
| 590 | 617 | 51347  | JKK      | 1.120 | 0.883 | 1.001 |
| 651 | 618 | 8999   | CDKL2    | 1.120 | 0.883 | 1.001 |
| 390 | 619 | 64781  | CERK     | 0.761 | 1.244 | 1.002 |
| 235 | 620 | 10114  | HIPK3    | 1.408 | 0.603 | 1.005 |
| 179 | 621 | 389840 | MAP3K15  | 1.065 | 0.963 | 1.014 |
| 570 | 622 | 7049   | TGFBR3   | 1.323 | 0.706 | 1.014 |
| 469 | 623 | 8711   | TNK1     | 0.645 | 1.407 | 1.026 |
| 620 | 624 | 54899  | PXK      | 1.102 | 0.976 | 1.039 |
| 636 | 625 | 2047   | EPHB1    | 1.396 | 0.706 | 1.051 |
| 75  | 626 | 1455   | CSNK1G2  | 1.342 | 0.761 | 1.051 |
| 499 | 627 | 3757   | KCNH2    | 1.779 | 0.342 | 1.061 |
| 340 | 628 | 23604  | DAPK2    | 0.815 | 1.339 | 1.077 |
| 50  | 629 | 6093   | ROCK1    | 0.994 | 1.175 | 1.085 |
| 161 | 630 | 10746  | MAP3K2   | 1.278 | 0.892 | 1.085 |
| 691 | 631 | 3364   | HUS1     | 0.995 | 1.185 | 1.090 |
| 490 | 632 | 238    | ALK      | 1.555 | 0.627 | 1.091 |
| 59  | 633 | 11183  | MAP4K5   | 1.442 | 0.740 | 1.091 |
| 638 | 634 | 83983  | SSTK     | 1.779 | 0.407 | 1.093 |



|     |     |        |          |       |       |       |
|-----|-----|--------|----------|-------|-------|-------|
| 477 | 635 | 23678  | SGKL     | 0.434 | 1.768 | 1.101 |
| 399 | 636 | 6416   | MAP2K4   | 0.692 | 1.518 | 1.105 |
| 140 | 637 | 8767   | RIPK2    | 1.342 | 0.871 | 1.106 |
| 139 | 638 | 5585   | PRKCL1   | 1.442 | 0.782 | 1.112 |
| 557 | 639 | 84446  | KIAA1811 | 1.359 | 0.883 | 1.121 |
| 156 | 640 | 10110  | SGK2     | 1.553 | 0.701 | 1.127 |
| 90  | 641 | 801    | CALM1    | 0.706 | 1.577 | 1.142 |
| 91  | 642 | 152110 | FLJ32685 | 1.194 | 1.092 | 1.143 |
| 130 | 643 | 10494  | STK25    | 1.553 | 0.740 | 1.146 |
| 68  | 644 | 6041   | RNASEL   | 1.594 | 0.719 | 1.156 |
| 699 | 645 | 118672 | C10ORF89 | 1.341 | 0.976 | 1.159 |
| 201 | 646 | 2322   | FLT3     | 1.249 | 1.092 | 1.170 |
| 171 | 647 | 139189 | DGKK     | 1.140 | 1.205 | 1.172 |
| 98  | 648 | 203    | AK1      | 1.042 | 1.327 | 1.185 |
| 350 | 649 | 1633   | DCK      | 1.067 | 1.339 | 1.203 |
| 30  | 650 | 1152   | CKB      | 1.017 | 1.395 | 1.206 |
| 51  | 651 | 7010   | TEK      | 0.951 | 1.464 | 1.208 |
| 155 | 652 | 5129   | PCTK3    | 1.222 | 1.205 | 1.213 |
| 650 | 653 | 5578   | PRKCA    | 1.135 | 1.301 | 1.218 |
| 157 | 654 | 8798   | DYRK4    | 1.726 | 0.719 | 1.222 |
| 170 | 655 | 640    | BLK      | 1.017 | 1.428 | 1.223 |
| 22  | 656 | 23729  | CARKL    | 1.278 | 1.175 | 1.227 |
| 226 | 657 | 55561  | HSMDPKIN | 1.594 | 0.871 | 1.232 |
| 222 | 658 | 81629  | STK22C   | 1.140 | 1.360 | 1.250 |
| 180 | 659 | 2931   | GSK3A    | 1.042 | 1.464 | 1.253 |
| 77  | 660 | 23043  | TNIK     | 1.442 | 1.092 | 1.267 |
| 661 | 661 | 1158   | CKM      | 1.120 | 1.427 | 1.273 |
| 162 | 662 | 26524  | LATS2    | 1.514 | 1.038 | 1.276 |
| 62  | 663 | 5256   | PHKA2    | 1.249 | 1.327 | 1.288 |
| 554 | 664 | 1457   | CSNK2A1  | 1.323 | 1.301 | 1.312 |
| 233 | 665 | 23387  | KIAA0999 | 1.442 | 1.205 | 1.323 |
| 710 | 666 | 140609 | NEK7     | 1.577 | 1.077 | 1.327 |
| 154 | 667 | 51135  | IRAK4    | 1.514 | 1.148 | 1.331 |
| 148 | 668 | 7204   | TRIO     | 1.553 | 1.118 | 1.336 |
| 669 | 669 | 50808  | AK3L1    | 1.120 | 1.564 | 1.342 |
| 649 | 670 | 8408   | ULK1     | 1.323 | 1.427 | 1.375 |
| 210 | 671 | 5586   | PRKCL2   | 1.408 | 1.360 | 1.384 |
| 223 | 672 | 55361  | PI4KII   | 1.374 | 1.395 | 1.385 |
| 549 | 673 | 25865  | PRKD2    | 1.216 | 1.564 | 1.390 |
| 320 | 674 | 204851 | HIPK1    | 0.761 | 2.024 | 1.392 |

|     |     |        |              |       |       |       |
|-----|-----|--------|--------------|-------|-------|-------|
| 158 | 675 | 55229  | PANK4        | 1.408 | 1.428 | 1.418 |
| 149 | 676 | 55500  | ETNK1        | 1.594 | 1.264 | 1.429 |
| 61  | 677 | 472    | ATM          | 1.115 | 1.744 | 1.429 |
| 70  | 678 | 6011   | GRK1         | 1.773 | 1.092 | 1.432 |
| 491 | 679 | 10290  | SPEG         | 1.709 | 1.185 | 1.447 |
| 76  | 680 | 2011   | MARK2        | 1.635 | 1.264 | 1.450 |
| 120 | 681 | 5592   | PRKG1        | 1.726 | 1.175 | 1.450 |
| 190 | 682 | 9578   | CDC42BPB     | 1.478 | 1.464 | 1.471 |
| 630 | 683 | 22983  | SAST         | 2.066 | 0.883 | 1.474 |
| 229 | 684 | 25     | ABL1         | 1.594 | 1.360 | 1.477 |
| 519 | 685 | 55351  | STK32B       | 1.577 | 1.427 | 1.502 |
| 633 | 686 | 203447 | NRK          | 1.304 | 1.711 | 1.508 |
| 60  | 687 | 29941  | PKN3         | 1.932 | 1.092 | 1.512 |
| 220 | 688 | 1609   | DGKQ         | 1.514 | 1.577 | 1.546 |
| 230 | 689 | 56924  | PAK6         | 1.773 | 1.360 | 1.567 |
| 639 | 690 | 8517   | IKBKG        | 2.350 | 0.793 | 1.571 |
| 74  | 691 | 10769  | PLK2         | 1.478 | 1.699 | 1.589 |
| 20  | 692 | 79896  | THNSL1       | 1.310 | 1.884 | 1.597 |
| 110 | 693 | 54861  | SNRK         | 1.635 | 1.658 | 1.646 |
| 152 | 694 | 5294   | PIK3CG       | 1.442 | 1.884 | 1.663 |
| 79  | 695 | 5315   | PKM2         | 1.994 | 1.395 | 1.695 |
| 153 | 696 | 2261   | FGFR3        | 1.514 | 1.884 | 1.699 |
| 71  | 697 | 5987   | RFP          | 0.974 | 2.436 | 1.705 |
| 80  | 698 | 6792   | CDKL5        | 1.994 | 1.428 | 1.711 |
| 232 | 699 | 208    | AKT2         | 1.635 | 1.837 | 1.736 |
| 100 | 700 | 1195   | CLK1         | 1.932 | 1.699 | 1.816 |
| 73  | 701 | 341676 | NEK5         | 1.878 | 1.789 | 1.833 |
| 151 | 702 | 83440  | ADP-GK       | 1.514 | 2.161 | 1.838 |
| 240 | 703 | 81602  | CDADC1       | 2.125 | 1.577 | 1.851 |
| 159 | 704 | 5568   | PRKACG       | 2.277 | 1.500 | 1.889 |
| 619 | 705 | 1198   | CLK3         | 2.217 | 1.564 | 1.890 |
| 78  | 706 | 808    | CALM3        | 2.125 | 1.658 | 1.892 |
| 550 | 707 | 84254  | CAMKK1       | 2.250 | 1.564 | 1.907 |
| 559 | 708 | 253430 | IPMK         | 2.571 | 1.427 | 1.999 |
| 599 | 709 | 780    | DDR1         | 2.611 | 1.427 | 2.019 |
| 551 | 710 | 92335  | LYK5         | 2.493 | 1.564 | 2.028 |
| 150 | 711 | 225689 | ERK8         | 2.677 | 1.539 | 2.108 |
| 72  | 712 | 138429 | PIP5KL1      | 1.726 | 2.597 | 2.161 |
| 629 | 713 | 25989  | DKFZP434C131 | 2.696 | 1.877 | 2.286 |
| 160 | 714 | 2321   | FLT1         | 2.277 | 2.361 | 2.319 |

|     |     |     |       |       |       |       |
|-----|-----|-----|-------|-------|-------|-------|
| 589 | 715 | 814 | CAMK4 | 2.387 | 2.511 | 2.449 |
|-----|-----|-----|-------|-------|-------|-------|
